# Supplementary material
Source: PubMed Central journal article supplement (PMC3665408)
Supplement: NIHMS473698-supplement-Table_S1.pdf [file NIHMS473698-supplement-Table_S1.pdf]

| <b>Landmark</b> | <b>Coordinate<br/>X</b> | <b>Coordinate<br/>Y</b> |
|-----------------|-------------------------|-------------------------|
| 1               | 0.96                    | 0.94                    |
| 2               | 0.94                    | 0.95                    |
| 3               | 0.94                    | 0.93                    |
| 4               | 0.93                    | 0.86                    |
| 5               | 0.88                    | 0.94                    |
| 6               | 0.85                    | 0.89                    |
| 7               | 0.97                    | 0.93                    |
| 8               | 0.85                    | 0.82                    |
| 9               | 0.93                    | 0.89                    |
| 10              | 0.94                    | 0.90                    |
| 11              | 0.93                    | 0.94                    |
| 12              | 0.93                    | 0.93                    |
